# Supplementary material for: In situ etching strategy to construct yolk–shell CoSe2@NiCoSe4-NC heterostructures for high-performance sodium ion battery
Source: Royal Society of Chemistry journal article supplement (doi:10.1039/d1qm01360b), 2021-12-02
Supplement: d1qm01360b1.pdf [file d1qm01360b1.pdf]

## In-situ etching strategy to construct yolk-shell $\text{CoSe}_2@\text{NiCoSe}_4\text{-NC}$ heterostructures for high-performance sodium ion battery

Huajian Liang<sup>a</sup>, Xiaotong Li<sup>a</sup>, Zhiting Liu<sup>a</sup>, Wei Yang<sup>a</sup>, Xinlong Liu<sup>a</sup>, Yufei Zhang<sup>b\*</sup> and Haosen Fan<sup>a\*</sup>

<sup>a</sup>School of Chemistry and Chemical Engineering, Guangzhou University, Guangzhou 510006, China

<sup>b</sup>School of Chemical Engineering and Light Industry, Guangdong University of Technology, Guangzhou 510006, PR China

E-mail: [hsfan@gzhu.edu.cn](mailto:hsfan@gzhu.edu.cn); [yfzhang@gdut.edu.cn](mailto:yfzhang@gdut.edu.cn)

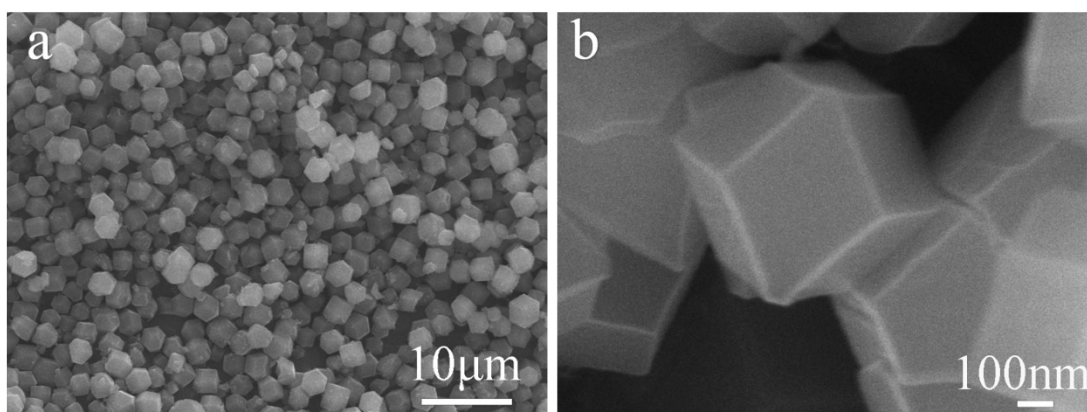

Fig. S1 (a-b) SEM images of ZIF67.

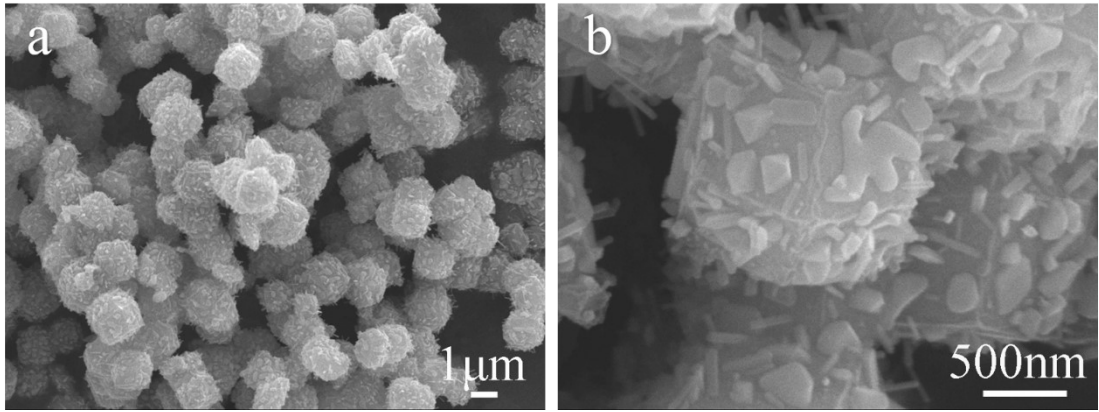

Fig. S2 (a-b) SEM images of  $\text{CoSe}_2/\text{NiSe}_2/\text{NC}$ .

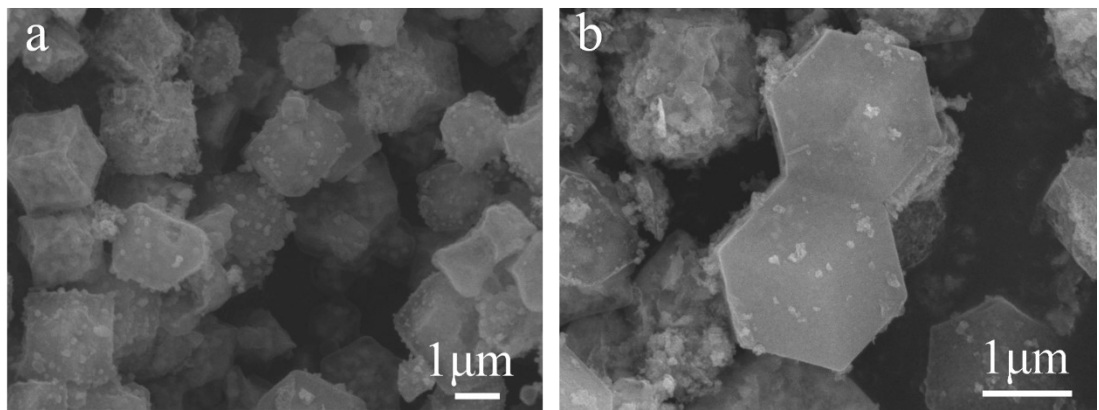

Fig. S3 (a-b) SEM images of  $\text{CoSe}_2/\text{NC}$ .

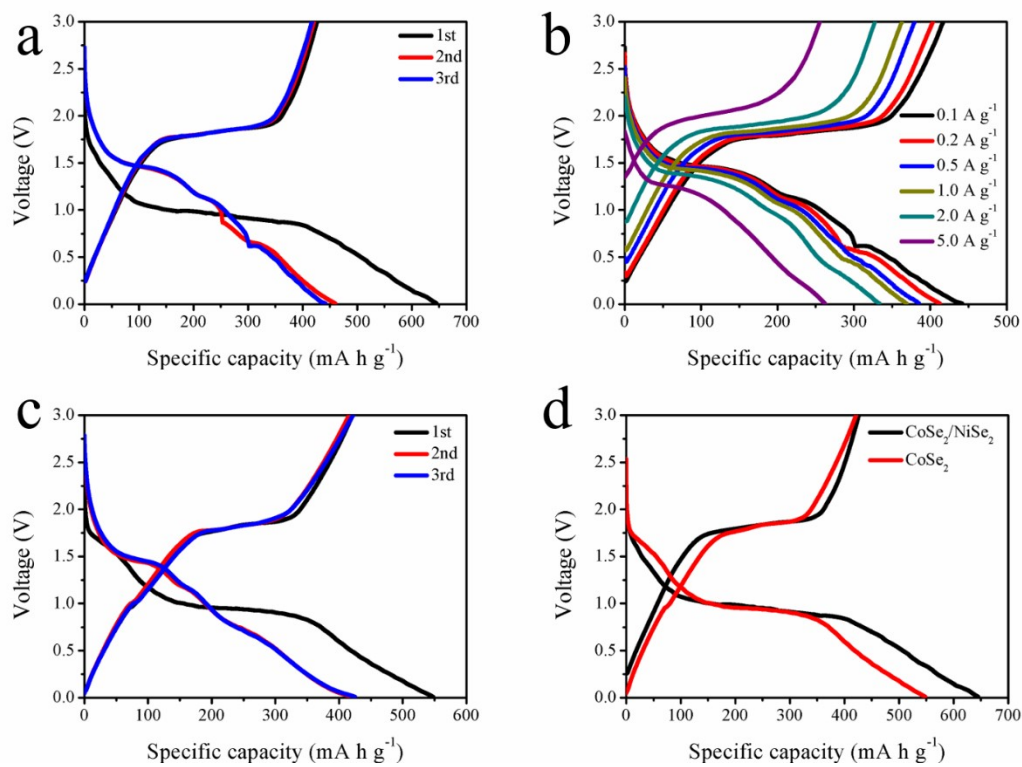

Fig. S4 (a) charge/discharge profiles of CoSe<sub>2</sub>/NiSe<sub>2</sub>/NC at the 1st, 2nd and 3rd; (b) galvanostatic profiles of CoSe<sub>2</sub>/NiSe<sub>2</sub>/NC; (c) charge/discharge profiles of pure CoSe<sub>2</sub>/NC; (d) charge/discharge profiles of CoSe<sub>2</sub>/NiSe<sub>2</sub>/NC and pure CoSe<sub>2</sub>/NC at 1st.
